# Supplementary material for: SNP-based analysis of genetic diversity reveals important alleles associated with seed size in rice
Source: PubMed Central journal article supplement (PMC4837510; doi:10.1186/s12870-016-0779-3), 2016-04-19
Supplement: 12870_2016_779_MOESM2_ESM.pdf [file 12870_2016_779_MOESM2_ESM.pdf]

Supplementary Table 2 Primers for twelve SNP genotypes from the twelve chromosomes respectively, using Sanger sequencing on the ABI3730xl DNA sequencer (ABI, CA, USA)

| Alleles | Chromosome | Position | Primer                                                   |
|---------|------------|----------|----------------------------------------------------------|
| C/T     | 1          | 4328     | F CAGGCAGAGAATTTTAGGGAGATA<br>R GACAATGAATTTTAGGGCTTTACG |
| T/A     | 2          | 27572325 | F ATGAAATCCGCAACTATGTGGT<br>R AACGTGCCTATGCCTAATGAAGAT   |
| C/T     | 3          | 33988653 | F AGTCACGATTGCCTCACCACCAT<br>R GGCCTCCCTAGCATATTTGACTCC  |
| C/T     | 4          | 8214531  | F ATGCTTCGCCGTTGCCTTCT<br>R TTTTCGTTAGCGTGGTTCGTTGAT     |
| G/A     | 5          | 13992737 | F TTGGCCTAAAACCTGTGAGC<br>R ATCCGTATTGCGACTTGAAAACCT     |
| G/A     | 6          | 21031848 | F CGCCTACCCCTACGCCTACG<br>R CTCTCCTCCCGCTTGTGAATGTT      |
| A/G     | 7          | 8524028  | F TGGCATCAGCGGTCTTTC<br>R AGGGATTTAACGGCTTGTC            |
| C/T     | 8          | 4647706  | F TCCCGCAGCTAAGCATAAGATT<br>R CGCCGGGGTTTCAGCAGT         |
| C/T     | 9          | 3063991  | F TGGAGGCGTCGTAGTCGGTAATGT<br>R GAGGCGACGTCGTGGCTTCTGTTC |
| C/T     | 10         | 7017746  | F CTGTTACCGGCTTTGTTTCTGTG<br>R CCATGACCCGGTTTTTGTAGG     |
| T/C     | 11         | 18434679 | F TTGAAAGTGGGAAATGTTGACC<br>R AGAAAGTACGTATGATCGGAAAAA   |
| A/C     | 12         | 25828739 | F TAGCCGCCATCCTTCCATTG<br>R ACGGTTTTTCAGATATTGTCCAC      |
